# Supplementary material for: Surface-passivated Cu conductors for high-temperature sulfurous environments
Source: Royal Society of Chemistry journal article supplement (doi:10.1039/d2na00452f), 2022-01-01
Supplement: d2na00452f1.pdf [file d2na00452f1.pdf]

## Supporting Information

### Surface passivated Cu conductors for high temperature sulfurous environment

Zheng Li,<sup>a</sup> Jian Yu,<sup>b</sup> Saurabh Khuje,<sup>a</sup> Aaron Sheng,<sup>a</sup> Marieross Navarro,<sup>a</sup> Cheng-Gang Zhuang,<sup>c</sup> and Shenqiang Ren<sup>a,d,e,\*</sup>

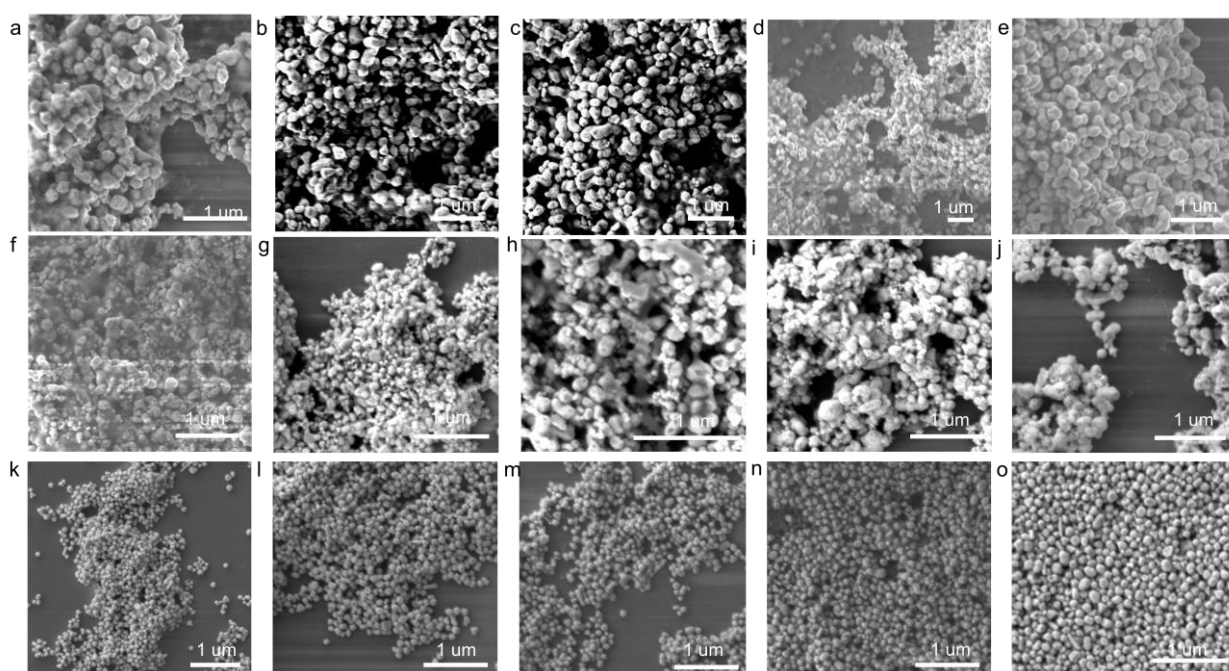

Figure S1 SEM of Cu NPs derived from different PVP concentration and reaction time: (a) 2 mM and 10 min; (b) 2 mM and 25 min; (c) 2 mM and 40 min; (d) 2 mM and 55 min; (e) 2 mM and 70 min; (f) 3mM and 10 min; (g) 3mM and 25 min; (h) 3 mM and 40 min; (i) 3mM and 55 min(j) 3mM and 70 min; (k) 4 mM and 10 min; (l) 4 mM and 25 min; (m) 4 mM and 40 min; (n) 4 mM and 55 min; and (o) 2 mM and 70 min.

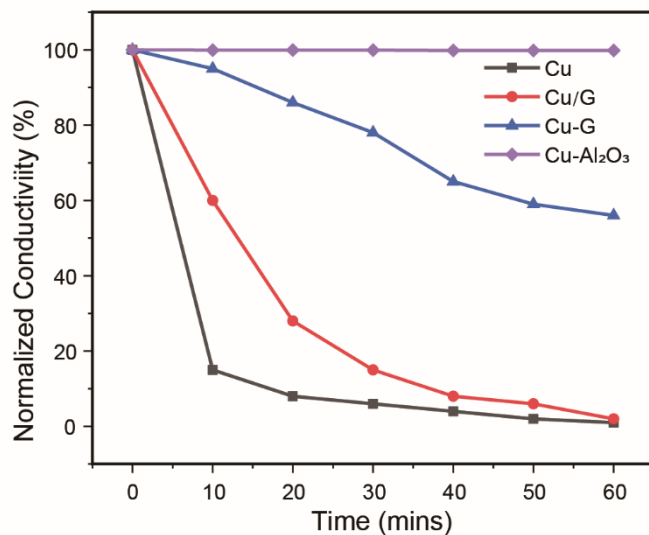

Figure S2 The conductivity changes of Cu-based conductors (Cu, Cu/G, Cu-G and Cu-Al<sub>2</sub>O<sub>3</sub>) at 35°C sulphurous atmosphere.

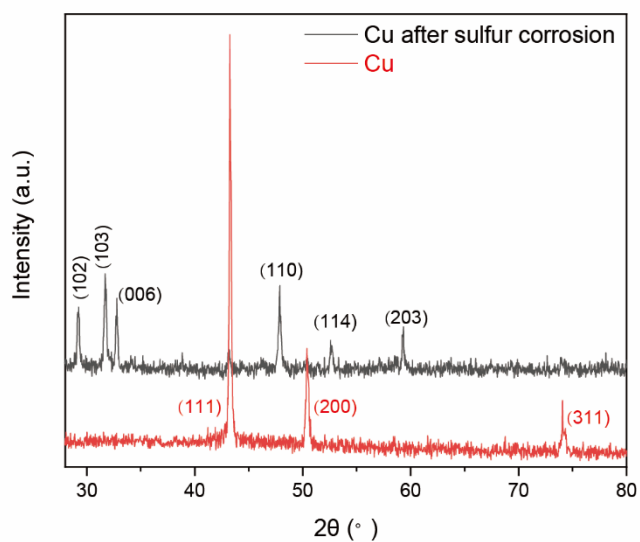

Figure S3 XRD of Cu conductors before and after sulfur corrosion.

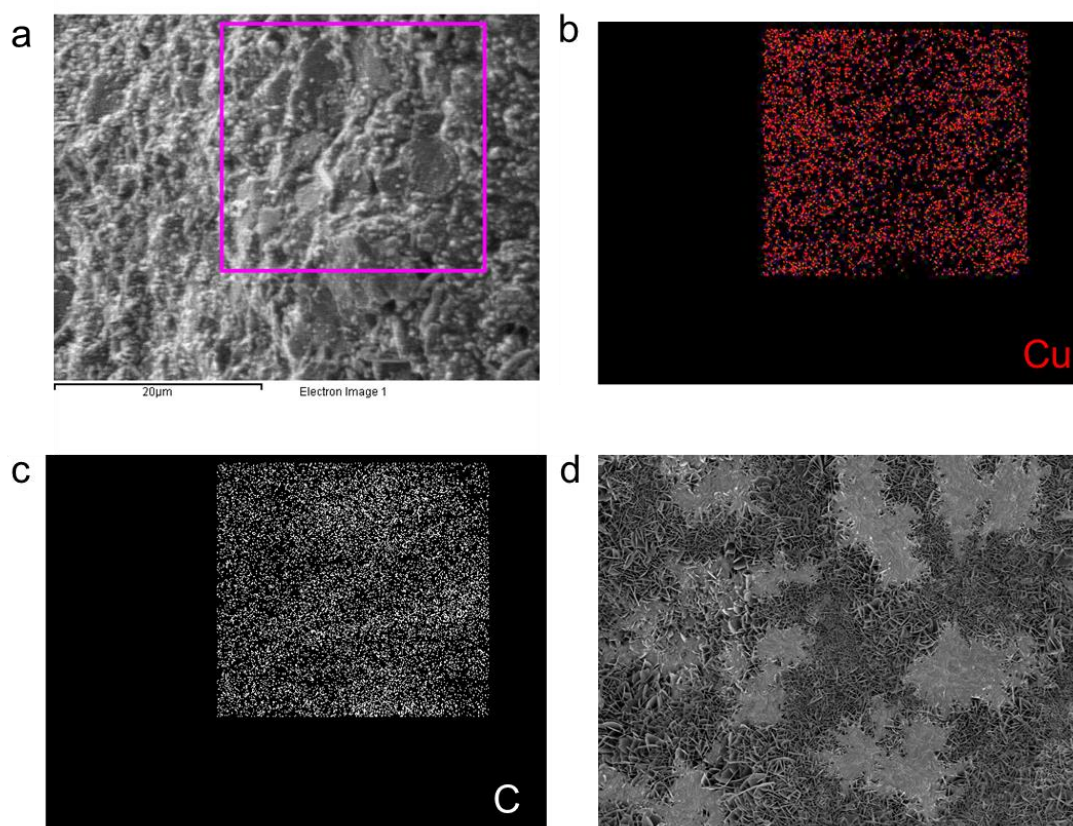

Figure S4 (a) SEM of Cu/G conductors, (b-c) EDS of Cu/G conductors, and (d) SEM of Cu/G conductors after sulfur corrosion.

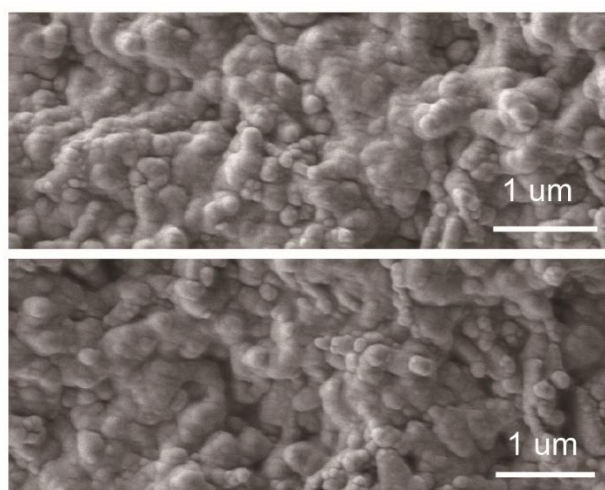

Figure S5 SEM of Cu-Al<sub>2</sub>O<sub>3</sub> conductors before (top) and after (bottom) sulfur corrosion.
